# Supplementary material for: Profiling the peripheral blood T cell receptor repertoires of gastric cancer patients
Source: Front Immunol. 2022 Jul 28;13:848113. doi: 10.3389/fimmu.2022.848113 (PMC9367216; doi:10.3389/fimmu.2022.848113)
Supplement: Supplementary file 6 [file Table_1.xlsx]

## Sheet: table1
Table1. Sample information
SampleID	Gender	Age	Stage	Group	HLA	Weight	Height	BMI	EBV-IgG	CD3 number (total T cell number)(/ul)	CD4 number(/ul)	CD8 number(/ul)	NK number(/ul)	B number(/ul)	CD3%	CD4%	CD8%	CD4/CD8	NK%	B%
Cr016	Male	46	Control	Control	A*11:01;A*02:07;B*15:01;B*51:01;C*15:02;C*08:01	67	1.67	24.0238	0	1144	401	513	665	110	59.5	20.9	26.7	0.78	34.6	5.8
Cr022	Male	35	Control	Control	A*01:01;A*33:03;B*44:03;B*37:01;C*06:02;C*14:03	67	1.71	22.913	0	1130	424	616	471	124	65.2	24.5	35.5	0.69	27.2	7.2
Cr027	Male	47	Control	Control	A*23:01;A*02:06;B*15:27;B*44:03;C*08:03;C*04:01	89	1.67	31.9122	0	1321	773	492	374	116	72.5	42.4	27	1.57	20.6	6.4
Cr032	Male	35	Control	Control	A*24:02;A*30:01;B*40:01;B*13:02;C*03:04;C*06:02	43	1.6	16.7969	0	910	302	498	264	74	72.8	24.2	39.9	0.61	21.1	6
Cr033	Female	36	Control	Control	A*26:01;A*01:01;B*35:01;B*08:01;C*03:03;C*07:02	60	1.6	23.4375	0	1357	785	533	157	230	77.6	44.9	30.5	1.47	9	13.2
Cr035	Male	38	Control	Control	A*24:02;A*03:01;B*35:01;B*44:02;C*03:03;C*05:01	95	1.71	32.4886	0	1529	931	511	1074	158	55.2	33.6	18.5	1.82	38.8	5.7
Cr036	Male	40	Control	Control	A*02:01;A*01:01;B*07:05;B*40:01;C*15:05;C*15:02	NA	NA	NA	0	1198	568	510	257	166	73.7	35	31.4	1.11	15.8	10.3
Cr037	Male	43	Control	Control	A*03:01;A*02:06;B*07:02;B*40:02;C*07:02;C*04:01	80	1.76	25.8264	0	1791	870	832	665	243	66.2	32.2	30.8	1.05	24.6	9
Cr050	Female	35	Control	Control	A*11:01;A*02:10;B*40:01;B*40:06;C*03:04;C*08:01	NA	NA	NA	2	1434	605	758	137	194	81.1	34.2	42.9	0.8	7.8	11
Cr051	Female	35	Control	Control	A*31:01;A*02:06;B*51:02;B*13:01;C*15:02;C*08:01	78	1.57	31.6443	0	1547	821	511	264	327	72.1	38.3	23.8	1.61	12.3	15.2
Cr052	Female	45	Control	Control	A*02:01;A*33:03;B*58:01;B*13:01;C*03:02;C*03:04	58	1.64	21.5645	0	1327	677	611	377	161	70.9	36.2	32.7	1.11	20.2	8.6
Cr054	Female	55	Control	Control	A*24:02;A*11:01;B*15:02;B*40:06;C*08:01;C*08:01	63	1.6	24.6094	0	1425	923	423	383	136	73.1	47.4	21.7	2.18	19.7	7
Cr055	Female	42	Control	Control	A*24:02;A*02:06;B*40:01;B*13:01;C*03:04;C*03:04	67	1.66	24.3141	0	1381	814	490	295	172	74.3	43.8	26.4	1.66	15.9	9.3
Cr056	Female	36	Control	Control	A*11:01;A*11:01;B*46:01;B*55:02;C*01:02;C*01:02	46	1.64	17.1029	0	1054	437	469	338	40	73.1	30.3	32.5	0.93	23.5	2.8
Cr057	Female	38	Control	Control	A*01:01;A*02:07;B*46:01;B*35:02;C*04:01;C*01:02	76	1.67	27.2509	0	1779	985	364	142	312	79.4	44	16.3	2.7	6.4	13.9
Cr058	Male	55	Control	Control	A*01:01;A*11:01;B*44:03;B*40:06;C*04:01;C*08:01	NA	NA	NA	0	1396	1048	324	491	200	66.7	50.1	15.5	3.23	23.5	9.6
Cr059	Male	63	Control	Control	A*26:01;A*02:01;B*15:01;B*13:01;C*03:04;C*03:03	NA	NA	NA	NA	1090	580	429	280	60	76	40.4	29.9	1.35	19.5	4.2
Cr060	Female	58	Control	Control	A*11:01;A*03:01;B*44:02;B*40:06;C*03:03;C*05:01	67	1.56	27.5312	0	1094	755	309	316	223	66.8	46.2	18.9	2.44	19.3	13.6
Cr061	Female	65	Control	Control	A*11:01;A*02:06;B*40:02;B*40:01;C*07:02;C*03:04	NA	NA	NA	0	1220	798	423	194	99	80.3	52.5	27.9	1.88	12.8	6.5
Cr062	Male	63	Control	Control	A*24:02;A*26:01;B*51:01;B*27:05;C*14:02;C*02:02	NA	NA	NA	0	2036	1145	553	784	430	62.5	35.2	17	2.07	24.1	13.2
Cr063	Female	50	Control	Control	A*11:01;A*23:01;B*13:01;B*15:11;C*03:03;C*03:04	NA	NA	NA	0	1118	667	395	122	108	82.3	49.1	29.1	1.69	9	8
Cr064	Female	55	Control	Control	A*24:02;A*33:03;B*46:01;B*44:03;C*07:06;C*01:02	NA	NA	NA	0	627	381	218	294	75	62.6	38	21.8	1.74	29.4	7.6
Cr065	Male	66	Control	Control	A*24:02;A*02:01;B*46:01;B*54:01;C*01:02;C*01:02	NA	NA	NA	NA	1726	889	605	312	191	77.1	39.7	27	1.47	14	8.5
Cr066	Male	64	Control	Control	A*11:01;A*02:06;B*46:01;B*40:01;C*03:04;C*01:02	NA	NA	NA	0	510	325	173	115	96	70.4	44.9	24	1.87	15.9	13.3
Cr067	Male	61	Control	Control	NA	NA	NA	NA	0	2487	1605	852	707	312	70.8	45.7	24.2	1.89	20.1	8.9
Cr068	Female	59	Control	Control	A*24:02;A*02:07;B*46:01;B*44:02;C*05:01;C*01:02	NA	NA	NA	0	1199	737	403	216	241	72.1	44.3	24.3	1.82	13	14.5
Cr072	Female	65	Control	Control	A*02:01;A*30:01;B*13:02;B*13:01;C*07:02;C*06:02	NA	NA	NA	0	1015	651	367	512	112	61.8	39.6	22.4	1.77	31.2	6.8
Cr073	Female	58	Control	Control	A*11:01;A*11:01;B*15:02;B*15:02;C*08:01;C*08:01	NA	NA	NA	NA	1471	865	519	554	294	63.2	37.2	22.3	1.67	23.8	12.6
Cr074	Female	45	Control	Control	A*02:06;A*26:01;B*46:01;B*38:01;C*01:02;C*12:03	NA	NA	NA	0	1144	619	433	559	234	58.8	31.8	22.3	1.43	28.7	12
Cr075	Female	48	Control	Control	A*24:02;A*26:01;B*54:01;B*40:02;C*01:02;C*15:02	NA	NA	NA	NA	1395	720	664	319	165	74.1	38.3	35.3	1.08	17	8.8
Cr076	Female	64	Control	Control	A*24:02;A*11:01;B*35:03;B*35:05;C*06:02;C*04:01	NA	NA	NA	0	771	582	183	470	147	55.4	41.9	13.2	3.17	33.8	10.6
Cr077	Male	68	Control	Control	A*24:02;A*11:02;B*27:04;B*40:02;C*12:02;C*03:03	71	1.74	23.4509	0	773	377	392	308	81	66.3	32.4	33.6	0.96	26.5	7
Cr078	Female	82	Control	Control	A*24:02;A*01:03;B*35:03;B*73:01;C*15:05;C*12:03	NA	NA	NA	NA	2221	799	1323	828	123	69.9	25.2	41.6	0.61	26.1	3.9
Cr079	Male	71	Control	Control	A*24:02;A*02:01;B*51:01;B*15:11;C*03:03;C*14:02	NA	NA	NA	NA	917	490	398	449	61	63.7	34.1	27.7	1.23	31.2	4.3
Cr080	Female	72	Control	Control	A*02:06;A*02:06;B*48:01;B*44:02;C*07:04;C*08:01	69	1.57	27.993	0	1197	758	355	591	149	61.6	39	18.3	2.13	30.4	7.7
Cr082	Female	69	Control	Control	A*02:01;A*02:01;B*46:01;B*44:02;C*05:01;C*01:02	58	1.53	24.7768	0	1604	1100	393	881	77	62.3	42.8	15.3	2.8	34.2	3
Cr085	Female	80	Control	Control	A*11:01;A*23:01;B*45:01;B*51:02;C*06:02;C*15:02	NA	NA	NA	0	824	453	367	517	178	54	29.7	24	1.24	33.9	11.7
Cr086	Female	68	Control	Control	A*24:02;A*02:01;B*44:02;B*15:07;C*03:03;C*05:01	NA	NA	NA	0	606	337	249	630	203	42	23.4	17.3	1.35	43.7	14.1
Cr087	Female	75	Control	Control	A*24:02;A*02:07;B*46:01;B*15:01;C*03:03;C*01:03	NA	NA	NA	0	1399	600	681	386	51	76	32.6	37	0.88	21	2.8
Cr088	Male	61	Control	Control	A*24:20;A*01:01;B*48:01;B*35:01;C*08:03;C*08:01	NA	NA	NA	0	613	360	212	939	98	37.1	21.8	12.9	1.69	56.8	5.9
Cr089	Male	86	Control	Control	A*24:02;A*11:01;B*40:01;B*15:02;C*03:04;C*04:01	NA	NA	NA	0	2210	1403	1061	430	90	80.8	51.3	38.8	1.32	15.7	3.3
Cr090	Male	61	Control	Control	A*11:01;A*68:01;B*40:01;B*40:01;C*03:04;C*07:02	NA	NA	NA	0	2387	1614	586	345	294	78.7	53.2	19.3	2.76	11.4	9.7
Cr091	Male	79	Control	Control	NA	NA	NA	NA	NA	1858	552	1113	787	213	65	19.3	38.9	0.5	27.5	7.4
Cr093	Female	63	Control	Control	A*11:01;A*11:01;B*55:02;B*40:01;C*12:03;C*07:02	NA	NA	NA	0	871	524	292	248	161	67.8	40.8	22.8	1.79	19.3	12.6
Cr094	Male	68	Control	Control	A*02:01;A*02:01;B*51:01;B*35:01;C*03:03;C*14:02	NA	NA	NA	0	1520	758	693	383	141	73.8	36.8	33.6	1.1	18.6	6.9
Cr095	Male	67	Control	Control	A*31:01;A*33:03;B*44:03;B*51:01;C*07:06;C*14:02	NA	NA	NA	0	585	298	218	507	53	50.9	25.9	19	1.36	44.1	4.6
Cr096	Male	62	Control	Control	A*02:01;A*11:01;B*15:01;B*13:02;C*06:02;C*04:01	NA	NA	NA	0	1137	612	481	525	115	63.6	34.2	26.9	1.27	29.4	6.4
Cr097	Female	66	Control	Control	A*02:01;A*23:01;B*48:01;B*41:01;C*17:01;C*08:03	NA	NA	NA	0	1410	539	832	274	96	79	30.2	46.6	0.65	15.4	5.4
Cr099	Male	63	Control	Control	A*33:03;A*03:01;B*58:01;B*40:02;C*03:02;C*03:04	75	1.76	24.2123	0	989	440	534	538	103	60.5	26.9	32.7	0.82	32.9	6.3
Gr005	Male	38	I	Tumor	NA	70	1.75	22.8571	NA	1854.15	827.776	866.624	132.517	138.689	0.8583	0.3832	0.4012	0.955135	0.0613	0.0642
Gr011	Male	50	IV	Tumor	NA	68	1.67	24.3824	0	1001.05	520.394	300.666	246.318	27.4661	0.7756	0.4032	0.233	1.73047	0.1909	0.0213
Gr012	Male	67	NA	Tumor	NA	58	1.64	21.5645	0	644.929	466.774	138.703	250.414	51.9099	0.6399	0.4631	0.1376	3.36555	0.2485	0.0515
Gr013	Male	69	III	Tumor	NA	70	1.7	24.2215	2	1252.06	664.033	522.366	277.936	68.3596	0.7686	0.4076	0.3207	1.27097	0.1706	0.042
Gr015	Male	68	IV	Tumor	A*26:01;A*31:01;B*37:01;B*15:18;C*07:04;C*06:02	67	1.67	24.0238	0	1772.78	1087.25	588.468	530.727	273.963	0.6756	0.4143	0.2243	1.84708	0.2022	0.1044
Gr016	Male	73	IV	Tumor	A*31:01;A*32:01;B*44:02;B*51:01;C*05:01;C*14:02	50	1.62	19.052	0	1145.26	607.109	511.646	222.847	159.607	0.7357	0.39	0.3287	1.18649	0.1432	0.1025
Gr019	Female	71	III	Tumor	A*02:01;A*02:01;B*51:01;B*81:01;C*08:01;C*08:01	36	1.5	16	0	1464.98	952.813	454.49	267.041	240.51	0.7341	0.4775	0.2277	2.09706	0.1338	0.1205
Gr021	Male	48	IV	Tumor	A*30:01;A*30:01;B*13:02;B*13:02;C*06:02;C*06:02	68	1.76	21.9525	NA	820.17	398.82	325.145	94.9862	118.733	0.7818	0.3802	0.3099	1.22685	0.0905	0.1132
Gr023	Male	75	IV	Tumor	A*24:02;A*01:01;B*48:01;B*40:02;C*03:03;C*08:01	53	158	0.00212306	0	534.848	265.158	114.071	159.397	62.7011	0.6914	0.3428	0.1475	2.32407	0.2061	0.0811
Gr024	Male	71	IV	Tumor	A*11:01;A*02:06;B*48:01;B*07:02;C*07:02;C*08:01	55	1.57	22.3133	0	614.062	447.081	143.477	133.683	48.9683	0.7665	0.5581	0.1791	3.11614	0.1669	0.0611
Gr025	Male	57	IV	Tumor	A*31:01;A*68:01;B*52:01;B*37:01;C*12:02;C*06:02	75	1.8	23.1481	1	2208.95	1271.75	843.062	644.574	423.577	0.6672	0.3841	0.2546	1.50864	0.1947	0.1279
Gr030	Male	77	II	Tumor	A*24:02;A*29:01;B*07:05;B*40:06;C*15:05;C*08:01	73	1.66	26.4915	2	838.842	506.977	268.316	484.382	191.352	0.5323	0.3217	0.1703	1.88902	0.3073	0.1214
Gr031	Female	61	I	Tumor	A*24:02;A*02:01;B*13:01;B*13:01;C*03:04;C*03:04	50	1.59	19.7777	0	786.799	471.445	412.812	190.955	91.9121	0.7328	0.4391	0.3845	1.142	0.1779	0.0856
Gr034	Male	47	I	Tumor	A*11:01;A*11:01;B*15:01;B*13:01;C*04:01;C*08:01	79	1.72	26.7036	0	1332.66	867.023	404.699	108.626	216.59	0.7953	0.5174	0.2415	2.14244	0.0648	0.1292
Gr035	Male	52	III	Tumor	A*11:01;A*02:07;B*51:01;B*35:01;C*04:01;C*14:02	62	1.73	20.7157	0	943.408	598.878	328.326	248.71	189.527	0.6725	0.4269	0.2341	1.82358	0.1773	0.1351
Gr037	Male	66	IV	Tumor	A*31:01;A*02:01;B*38:02;B*13:01;C*07:02;C*03:04	54	1.69	18.9069	0	1073.96	676.221	275.096	235.119	94.8607	0.7609	0.4791	0.1949	2.45818	0.1666	0.0672
Gr038	Female	77	III	Tumor	A*02:01;A*30:01;B*13:02;B*13:01;C*03:04;C*06:02	49	1.59	19.3821	0	783.061	536.607	244.707	244.124	90.3084	0.6975	0.4779	0.218	2.1922	0.2174	0.0804
Gr040	Male	52	III	Tumor	A*24:02;A*11:01;B*15:18;B*13:01;C*03:04;C*08:01	53	1.58	21.2306	0	1282.41	745.017	527.89	341.296	276.158	0.6702	0.3894	0.2759	1.41138	0.1784	0.1443
Gr041	Male	39	IV	Tumor	A*03:01;A*03:01;B*44:02;B*52:01;C*07:02;C*05:01	74	1.74	24.4418	0	1118.26	559.475	469.82	229.35	134.135	0.7449	0.3727	0.313	1.19073	0.1528	0.0894
Gr042	Male	68	II	Tumor	A*02:01;A*03:01;B*07:02;B*81:01;C*07:02;C*08:01	50	1.62	19.052	0	1292.02	692.411	552.478	300.165	108.756	0.7342	0.3935	0.314	1.25318	0.1706	0.0618
Gr043	Male	59	I	Tumor	A*02:01;A*02:07;B*54:01;B*51:02;C*01:02;C*15:02	64	1.64	23.7954	0	2079.59	1055.43	885.837	367.599	411.18	0.722	0.3664	0.3076	1.19116	0.1276	0.1428
Gr044	Male	62	III	Tumor	NA	62	1.69	21.7079	0	3820.21	1286.05	2380.52	670.53	177.35	80.56	27.12	50.2	0.54	14.14	3.74
Gr046	Female	64	NA	Tumor	A*02:01;A*02:01;B*35:01;B*15:01;C*03:03;C*08:01	84	1.56	34.5168	0	1264.11	782.46	426.19	247.71	144.19	75.22	46.56	25.36	1.84	14.74	8.58
Gr048	Male	60	III	Tumor	A*11:01;A*02:07;B*51:01;B*46:01;C*01:02;C*14:02	52	1.62	19.8141	0	1006.81	664.71	334.05	937.37	134.21	47.56	31.4	15.78	1.99	44.28	6.34
Gr052	Male	67	III	Tumor	A*32:01;A*02:01;B*44:03;B*38:02;C*07:02;C*04:01	52	1.55	21.6441	0	1742.58	1047.8	663.98	942.96	254.69	58.84	35.38	22.42	1.58	31.84	8.6
Gr053	Male	52	NA	Tumor	A*24:02;A*11:01;B*48:01;B*39:01;C*03:03;C*07:02	59	1.73	19.7133	0	847.38	618.06	266.65	340.47	126.03	63.84	46.56	20.09	2.32	25.65	9.49
Gr054	Male	63	II	Tumor	A*02:01;A*11:01;B*35:01;B*15:02;C*03:03;C*08:01	62	1.72	20.9573	2	2604.03	1836.97	716.58	1299.95	199.42	62.94	44.4	17.32	2.56	31.42	4.82
Gr055	Male	68	III	Tumor	A*24:02;A*03:01;B*07:02;B*35:01;C*07:02;C*03:03	68	1.68	24.093	0	2148.1	988.09	928.14	1035.52	76.41	65.22	30	28.18	1.06	31.44	2.32
Gr058	Female	60	III	Tumor	A*11:01;A*02:06;B*15:01;B*15:11;C*03:03;C*01:02	38	1.44	18.3256	0	2659.3	1486.84	1173.24	884.61	363.52	67.42	37.7	29.75	1.27	22.43	9.22
Gr061	Male	65	I	Tumor	A*02:01;A*02:07;B*46:01;B*38:02;C*07:02;C*01:02	63	1.67	22.5896	0	2376.7	1276.25	1067.92	98.74	351.6	83.28	44.72	37.42	1.2	3.46	12.32
Gr063	Male	73	IV	Tumor	A*24:08;A*01:01;B*48:01;B*14:02;C*03:04;C*08:02	70	1.74	23.1206	0	1171.5	240.39	885.11	33.58	86.62	89.83	18.43	67.87	0.27	2.57	6.64
Gr064	Female	46	II	Tumor	A*26:01;A*30:01;B*13:02;B*67:01;C*07:02;C*06:02	57	1.6	22.2656	0	1372.74	808.18	526.1	265.25	330.16	68.59	40.38	26.29	1.54	13.25	16.5
Gr065	Male	50	III	Tumor	A*31:01;A*02:01;B*51:01;B*15:11;C*03:03;C*14:02	83	1.7	28.7197	0	2358.39	1451.96	452.57	426.1	409.31	71.88	44.25	13.79	3.21	12.99	12.48
Gr066	Male	48	III	Tumor	A*26:01;A*02:01;B*46:01;B*13:02;C*06:02;C*01:02	98	1.73	32.7442	0	1217.45	862.46	284.32	164.9	244.73	74.23	52.58	17.33	3.03	10.05	14.92
Gr067	Male	61	NA	Tumor	A*02:01;A*02:07;B*46:01;B*38:01;C*12:03;C*01:02	NA	NA	NA	NA	684.86	428.43	223.44	95.35	168.36	71.73	44.87	23.4	1.92	9.99	17.63
Gr069	Male	63	III	Tumor	A*02:01;A*26:01;B*35:01;B*38:01;C*03:03;C*12:03	78	1.65	28.6501	NA	979.5	488.65	411.47	236.22	157.66	70.64	35.24	29.68	1.19	17.04	11.37
Gr070	Male	67	NA	Tumor	A*24:02;A*02:07;B*39:01;B*46:01;C*07:02;C*01:02	86	1.67	30.8365	NA	864.01	416.23	347.27	98.31	119.1	77.99	37.57	31.35	1.2	8.87	10.75
Gr074	Male	56	NA	Tumor	A*02:01;A*33:03;B*40:06;B*44:03;C*07:06;C*08:01	NA	NA	NA	NA	2347.48	1107.64	1222.02	301.19	229.92	80.68	38.07	42	0.91	10.35	7.9
Gr075	Male	64	III	Tumor	A*26:01;A*11:01;B*57:01;B*40:06;C*05:01;C*03:32	55	1.7	19.0311	0	1218.79	874.49	330.59	361.27	164.58	67.54	48.46	18.32	2.65	20.02	9.12
Gr076	Male	22	NA	Tumor	A*02:01;A*29:02;B*45:01;B*46:01;C*01:02;C*06:02	72	1.72	24.3375	1	1994.81	1034.05	779.66	373.36	280.42	74.99	38.87	29.31	1.33	14.03	10.54
Gr078	Male	47	II	Tumor	A*32:01;A*30:01;B*35:01;B*13:02;C*06:02;C*04:01	81	1.72	27.3797	0	1578.88	1141.77	412.72	277.94	159.57	77.26	55.87	20.2	2.77	13.6	7.81
Gr079	Male	60	II	Tumor	A*24:02;A*02:06;B*07:02;B*15:46;C*07:02;C*03:03	62	1.63	23.3355	0	1319.91	920.15	349.69	542.47	178.59	64.21	44.76	17.01	2.63	26.39	8.69
Gr080	Male	64	II	Tumor	NA	60	1.55	24.974	0	1491.39	894.12	575.49	460.84	277.75	65.83	39.47	25.4	1.55	20.34	12.26
Gr081	Male	51	NA	Tumor	A*33:03;A*11:01;B*58:01;B*40:01;C*03:02;C*03:04	57	1.71	19.4932	0	877.21	508.79	313.16	269.83	135.43	67.7	39.27	24.17	1.62	20.82	10.45
Gr082	Male	75	III	Tumor	NA	66	1.66	23.9512	0	1450.83	1082.45	347.06	318.02	474.99	63.82	47.62	15.27	3.12	13.99	20.89
Gr083	Male	63	III	Tumor	A*02:01;A*11:01;B*18:01;B*13:02;C*12:03;C*06:02	57	1.72	19.2672	0	1183.67	598.36	538.87	298.06	104.66	74.42	37.62	33.88	1.11	18.74	6.58
Gr084	Female	65	NA	Tumor	A*02:01;A*02:01;B*27:05;B*40:02;C*03:04;C*02:02	54	1.56	22.1893	0	1437.71	962.96	469.75	424.82	77.88	73.77	49.41	24.1	2.05	21.8	4
Gr086	Male	61	IV	Tumor	A*24:93;A*02:06;B*48:01;B*15:01;C*08:01;C*01:02	84	1.69	29.4107	1	1158.03	764.66	309.35	251.46	127.91	74.42	49.14	19.88	2.47	16.16	8.22
Gr087	Male	58	III	Tumor	A*02:01;A*02:01;B*44:02;B*15:01;C*03:03;C*05:01	61	1.65	22.4059	0	1199.17	775.84	317.57	170.74	136.71	78.43	50.74	20.77	2.44	11.17	8.94
Gr088	Male	60	NA	Tumor	A*02:01;A*23:01;B*40:01;B*49:01;C*03:04;C*07:01	69	1.76	22.2753	1	1641.46	857.18	766.62	1053.11	156.63	56.86	29.69	26.55	1.12	36.48	5.43
Gr089	Female	40	IV	Tumor	A*02:01;A*02:01;B*15:05;B*15:11;C*03:03;C*04:01	48	1.58	19.2277	0	808.17	391.51	398.66	134.37	37.72	80.88	39.18	39.9	0.98	13.45	3.77
Gr090	Male	68	NA	Tumor	NA	60	1.72	20.2812	0	1336.89	810.37	457.8	327.87	109.89	74.7	45.28	25.58	1.77	18.32	6.14
Gr092	Male	65	III	Tumor	A*24:02;A*02:06;B*51:01;B*35:01;C*03:03;C*14:02	67	1.7	23.1834	0	671.22	344.22	281.33	466.88	72.55	54.93	28.17	23.02	1.22	38.21	5.94
Gr094	Male	81	IV	Tumor	A*24:02;A*02:07;B*46:01;B*15:07;C*03:03;C*01:02	54	1.67	19.3625	0	1090.65	429.96	620.04	837.22	45.43	54.74	21.58	31.12	0.69	42.02	2.28
Gr095	Male	67	III	Tumor	A*24:02;A*03:01;B*44:02;B*40:01;C*03:04;C*05:01	52	1.64	19.3337	0	2126.38	1016.8	1054.02	453.65	80.37	79.09	37.82	39.21	0.96	16.87	2.99
Gr100	Male	67	IV	Tumor	A*11:01;A*11:01;B*37:01;B*40:01;C*03:04;C*06:02	59	1.67	21.1553	2	1065.28	458.88	207.12	48.37	195.1	79.9	34.42	15.53	2.22	3.63	14.63
Gr102	Male	63	III	Tumor	A*02:01;A*03:02;B*35:03;B*40:06;C*04:01;C*08:01	83	1.72	28.0557	0	1026.59	494.03	483.88	172.57	92.92	78.52	37.79	37.01	1.02	13.2	7.11
Gr103	Female	70	III	Tumor	A*31:01;A*11:01;B*44:03;B*13:01;C*03:04;C*04:01	54	1.49	24.3232	0	1861.43	1243.66	514.9	910.66	95.89	64.06	42.8	17.72	2.42	31.34	3.3
Gr104	Male	86	NA	Tumor	A*02:01;A*02:01;B*39:01;B*15:11;C*03:03;C*07:02	NA	NA	NA	NA	739.57	344.8	317.63	557.56	57.38	53.88	25.12	23.14	1.09	40.62	4.18
Gr105	Female	38	III	Tumor	A*01:01;A*11:01;B*57:01;B*13:01;C*03:04;C*06:02	55	1.65	20.202	0	870.12	490.92	316.17	186.53	169.1	69.22	39.05	25.15	1.55	14.84	13.45
Gr106	Male	55	II	Tumor	A*33:01;A*02:06;B*51:01;B*14:02;C*08:02;C*14:02	65	1.67	23.3067	0	2123.3	1125.28	828.36	145.78	195.02	85.91	45.53	33.52	1.36	5.9	7.89
Gr107	Female	70	II	Tumor	A*24:20;A*02:03;B*40:01;B*38:02;C*07:02;C*07:02	63	1.56	25.8876	0	864.96	545.94	306.88	228.24	216.11	65.56	41.38	23.26	1.78	17.3	16.38
Gr108	Male	75	II	Tumor	A*24:02;A*11:01;B*46:01;B*15:18;C*08:01;C*01:02	53	1.65	19.4674	0	2396.79	1287.62	1039.55	834.75	221.7	69	37.07	29.93	1.24	24.03	6.38
Gr109	Male	51	NA	Tumor	A*24:02;A*02:01;B*13:02;B*15:11;C*03:03;C*06:02	59	1.71	20.1771	0	1881.21	1163.13	587.62	466.09	267.77	71.52	44.22	22.34	1.98	17.72	10.18
Gr110	Male	70	III	Tumor	A*24:02;A*03:01;B*40:06;B*18:01;C*12:03;C*08:01	84	1.72	28.3937	0	1410.87	678.65	686.81	193.7	196.89	77.71	37.38	37.83	0.99	10.67	10.84
Gr111	Male	67	III	Tumor	A*24:02;A*11:01;B*15:01;B*51:01;C*14:02;C*01:02	73	1.7	25.2595	1	1302.18	667.07	562.01	416.62	236.87	65.2	33.4	28.14	1.19	20.86	11.86
Gr112	Male	62	III	Tumor	A*24:02;A*24:02;B*54:01;B*54:01;C*01:02;C*01:02	52	1.63	19.5717	0	2380.87	1092.43	1219.44	418.9	231.43	77.98	35.78	39.94	0.9	13.72	7.58
Gr113	Male	67	III	Tumor	A*24:02;A*02:01;B*39:01;B*46:01;C*07:02;C*01:02	61	1.62	23.2434	0	1341.94	812.86	403.54	680.11	333.32	55.8	33.8	16.78	2.01	28.28	13.86
fisher.test	tumor	control	p.value	odd.ratio
Gender			3.989e-05	5.76
Male	57	23
Female	11	26
Age			0.126	1.84
<60	46	26
>=60	22	23
BMI			0.0165	4.27
<23	36	4
>=23	29	14
Unknown	3	31
wilcox.test	tumor	control	p.value
CD3+ number	1414.11	1300.96	0.629
CD4+ number	791.51	708.1	0.146
CD8+ number	548.3	513.49	0.888
NK+ number	383.4	442.33	0.029
B+ number	178.28	159.94	0.457
CD3%	48.87	67.77	0.062
CD4%	27.28	36.87	0.073
CD8%	18.94	26.9	0.003
CD4/CD8	1.69	1.53	0.208
NK%	13.42	23.48	1.054e-05
B%	6.28	8.43	0.016

## Sheet: table2
Table2. Clean Data summary
Samples	Raw reads	Raw bases (Mb)	Clean reads	Clean bases (Mb)	Clean data rate (%)	Clean read Q20 (%)	Clean read Q30 (%)	GC content (%)
Cr016	33446976	3344.7	32980574	3298.06	98.61	98.23	93.15	56.75
Cr022	22615774	2261.58	22219754	2221.98	98.25	97.69	91.5	57.83
Cr027	27325486	2732.55	27070322	2707.03	99.07	97.73	91.57	57.58
Cr032	22200224	2220.02	21685114	2168.51	97.68	96.62	88.49	58.33
Cr033	27340570	2734.06	27282634	2728.26	99.79	96.97	89.29	57.73
Cr035	28041592	2804.16	27990686	2799.07	99.82	97.17	89.9	58.14
Cr036	33590570	3359.06	33531070	3353.11	99.82	97.06	89.52	58.31
Cr037	21338044	2133.8	21310604	2131.06	99.87	97.98	92.19	57.37
Cr050	30116616	3011.66	30023494	3002.35	99.69	97.09	89.72	57.77
Cr051	23566306	2356.63	23529694	2352.97	99.84	98.03	92.43	57.83
Cr052	34640492	3464.05	34582482	3458.25	99.83	98.21	92.95	57.96
Cr054	23006394	2300.64	22964442	2296.44	99.82	98.43	93.81	57.42
Cr055	22103550	2210.36	22071854	2207.19	99.86	98.5	93.81	57.2
Cr056	21193536	2119.35	21158318	2115.83	99.83	98.37	93.48	57.78
Cr057	28216920	2821.69	28158586	2815.86	99.79	97.87	92.18	57.92
Cr058	15029020	1502.9	15004912	1500.49	99.84	98.12	92.76	57.53
Cr059	14367258	1436.73	14353888	1435.39	99.91	96.41	88.7	57.29
Cr060	43031048	4303.1	42953486	4295.35	99.82	98.16	92.69	57.55
Cr061	39743860	3974.39	39661594	3966.16	99.79	97.59	91.36	58.41
Cr062	30816248	3081.62	30717494	3071.75	99.68	98.14	92.73	57
Cr063	34949294	3494.93	34845424	3484.54	99.7	98.32	93.44	57.48
Cr064	40310504	4031.05	40180778	4018.08	99.68	97.88	92.09	57.6
Cr065	24654596	2465.46	24626820	2462.68	99.89	95.65	86.76	57.17
Cr066	15929590	1592.96	15876904	1587.69	99.67	97.69	91.39	59.68
Cr067	49277972	4927.8	49090940	4909.09	99.62	96.89	89.08	59.12
Cr068	11209706	1120.97	11172758	1117.28	99.67	96.99	89.31	59.46
Cr072	31019636	3101.96	30903628	3090.36	99.63	96.39	87.55	60.28
Cr073	28956112	2895.61	28925798	2892.58	99.9	95.75	87.06	57.46
Cr074	13033832	1303.38	12988474	1298.85	99.65	96.82	88.74	60.38
Cr075	17852788	1785.28	17833234	1783.32	99.89	95.83	87.19	57.05
Cr076	20952020	2095.2	20934750	2093.47	99.92	98.45	93.76	57.36
Cr077	53703886	5370.39	53645956	5364.6	99.89	97.96	92.35	58.02
Cr078	21625406	2162.54	21603180	2160.32	99.9	95.54	86.64	57.34
Cr079	22677302	2267.73	22642506	2264.25	99.85	95.56	86.93	57.01
Cr080	26428920	2642.89	26339320	2633.93	99.66	97.88	92.2	57.8
Cr082	39049494	3904.95	38917944	3891.79	99.66	97.65	91.66	57.63
Cr085	24028342	2402.83	23949896	2394.99	99.67	98.25	93.32	57.5
Cr086	16122074	1612.21	16070198	1607.02	99.68	98.34	93.53	57.44
Cr087	34429722	3442.97	34305716	3430.57	99.64	97.97	92.38	57.41
Cr088	38751056	3875.11	38702170	3870.22	99.87	97.66	91.41	57.98
Cr089	30563190	3056.32	30535300	3053.53	99.91	98.42	93.67	57.47
Cr090	31249574	3124.96	31214706	3121.47	99.89	98.34	93.37	57.55
Cr091	20940664	2094.07	20917958	2091.8	99.89	95.66	86.77	57.27
Cr093	26330392	2633.04	26296976	2629.7	99.87	98.69	94.55	57.03
Cr094	31767362	3176.74	31735650	3173.57	99.9	98.59	94.2	57.21
Cr095	42432130	4243.21	42383692	4238.37	99.89	97.91	92.12	57.57
Cr096	25923358	2592.34	25889014	2588.9	99.87	98.36	93.47	56.56
Cr097	39174248	3917.42	39146160	3914.62	99.93	98.53	93.92	57.2
Cr099	26511592	2651.16	26478446	2647.84	99.87	98.16	92.94	57.06
Gr005	30061652	3006.17	30036096	3003.61	99.91	96.46	88.39	57.36
Gr011	28665076	2866.51	28633476	2863.35	99.89	96.55	88.78	57.22
Gr012	18642060	1864.21	18623754	1862.38	99.9	96.92	89.66	57.44
Gr013	29667382	2966.74	29630820	2963.08	99.88	96.63	89.06	57.42
Gr015	25582846	2558.28	25548240	2554.82	99.86	97.05	90.17	57.62
Gr016	23553502	2355.35	23513738	2351.37	99.83	95.45	85.99	58.08
Gr019	20646920	2064.69	20617274	2061.73	99.86	96.02	87.42	57.7
Gr021	34387302	3438.73	34337074	3433.71	99.85	95.64	86.47	58.53
Gr023	26681724	2668.17	26644148	2664.41	99.86	95.96	87.52	58.03
Gr024	19200548	1920.05	19177692	1917.77	99.88	96.1	87.6	57.59
Gr025	18215296	1821.53	18192056	1819.21	99.87	95.35	85.53	58.2
Gr030	20187988	2018.8	20155322	2015.53	99.84	95.67	86.57	58.4
Gr031	24018020	2401.8	23982422	2398.24	99.85	95.64	86.62	58.3
Gr034	23102360	2310.24	23080348	2308.03	99.9	96.64	88.98	57.7
Gr035	22364158	2236.42	22335282	2233.53	99.87	96.12	87.72	57.55
Gr037	15636454	1563.65	15611396	1561.14	99.84	95.44	85.97	58.35
Gr038	20346358	2034.64	20319414	2031.94	99.87	95.7	86.84	57.55
Gr040	20709344	2070.93	20680724	2068.07	99.86	96.42	88.53	57.33
Gr041	12945528	1294.55	12924836	1292.48	99.84	96.34	88.22	57.72
Gr042	20595426	2059.54	20571404	2057.14	99.88	96.53	88.83	57.14
Gr043	28005654	2800.57	27974838	2797.48	99.89	96.54	88.74	57.71
Gr044	32246364	3224.64	32020928	3202.09	99.3	97.47	93.86	56.94
Gr046	50682398	5068.24	48747080	4874.71	96.18	97.63	94.23	57.25
Gr048	39521512	3952.15	39276350	3927.64	99.38	97.38	93.56	57.33
Gr052	56020662	5602.07	54454490	5445.45	97.2	97.52	94	57.69
Gr053	50564714	5056.47	49788024	4978.8	98.46	97.53	94	56.83
Gr054	44485796	4448.58	44242234	4424.22	99.45	97.47	93.87	56.98
Gr055	38816778	3881.68	38663148	3866.31	99.6	97.77	94.83	55.02
Gr058	36344974	3634.5	36005696	3600.57	99.07	97.62	94.2	57.12
Gr061	45629218	4562.92	45228004	4522.8	99.12	97.59	94.17	56.77
Gr063	33394974	3339.5	33153942	3315.39	99.28	97.41	93.65	57.3
Gr064	43878968	4387.9	43525114	4352.51	99.19	97.7	94.47	56.68
Gr065	54688826	5468.88	54066688	5406.67	98.86	97.51	93.92	57.12
Gr066	36217590	3621.76	35794116	3579.41	98.83	97.52	94.05	56.64
Gr067	31402924	3140.29	30824946	3082.49	98.16	97.3	93.36	57.23
Gr069	40815058	4081.51	38501214	3850.12	94.33	97.67	94.38	57.09
Gr070	34499938	3449.99	34105132	3410.51	98.86	97.38	93.7	57.59
Gr074	30490874	3049.09	27954412	2795.44	91.68	97.56	94.07	56.61
Gr075	29279822	2927.98	27581206	2758.12	94.2	97.7	94.45	56.99
Gr076	34578546	3457.85	32590430	3259.04	94.25	97.7	94.43	56.81
Gr078	22242032	2224.2	22187266	2218.73	99.75	97.59	94.22	57.05
Gr079	31905654	3190.57	31847450	3184.74	99.82	97.38	93.62	57.48
Gr080	21049242	2104.92	20998576	2099.86	99.76	97.12	92.89	57.75
Gr081	75156092	7515.61	74991680	7499.17	99.78	97.41	93.74	57.5
Gr082	49947432	4994.74	49838360	4983.84	99.78	97.31	93.52	57.51
Gr083	30052852	3005.29	29441034	2944.1	97.96	96.78	90.31	57.76
Gr084	41423106	4142.31	40634064	4063.41	98.1	96.6	89.75	57.69
Gr086	44555250	4455.52	43535622	4353.56	97.71	96.93	90.63	57.77
Gr087	20727294	2072.73	18293880	1829.39	88.26	96.53	89.64	58.17
Gr088	40781170	4078.12	39468700	3946.87	96.78	96.81	90.35	58.16
Gr089	30530236	3053.02	30437560	3043.76	99.7	96.26	89.04	57.78
Gr090	31823076	3182.31	31752270	3175.23	99.78	96.62	89.94	57.95
Gr092	37224914	3722.49	37101996	3710.2	99.67	97.03	90.8	57.04
Gr094	39109240	3910.92	39025288	3902.53	99.79	96.75	90.1	57.97
Gr095	51588698	5158.87	51453074	5145.31	99.74	97	90.81	57.81
Gr100	12059518	1205.95	12015700	1201.57	99.64	96.42	89.38	58.16
Gr102	58187444	5818.74	57900256	5790.03	99.51	96.94	90.67	57.56
Gr103	22148568	2214.86	22076478	2207.65	99.67	96.67	89.91	56.89
Gr104	34559310	3455.93	34454740	3445.47	99.7	96.16	88.59	58.39
Gr105	38641772	3864.18	38151436	3815.14	98.73	96.97	90.82	57.49
Gr106	16217114	1621.71	16175912	1617.59	99.75	96.73	89.95	56.55
Gr107	15798816	1579.88	15532066	1553.21	98.31	96.57	89.74	57.66
Gr108	32223870	3222.39	32124924	3212.49	99.69	97.08	90.85	57.94
Gr109	37533108	3753.31	37075552	3707.56	98.78	96.61	89.83	57.1
Gr110	24173672	2417.37	23919392	2391.94	98.95	96.87	90.55	57.64
Gr111	47216804	4721.68	45539742	4553.97	96.45	97.21	91.37	57.41
Gr112	41499196	4149.92	40897628	4089.76	98.55	97.12	91.18	57.27
Gr113	19000484	1900.05	18873672	1887.37	99.33	95.94	88.32	58.23

## Sheet: table3
Table3. Data Alignment summary
filtered.Clonetype.no: 1) remove CDR3 short than 6 or longer than 25; 2) remove unfunctional CDR3; 3) remove CDR3 not start with "C" or end with "F"or "L" (/^C[\*|\w]+[F|L]$/)
sample.id	Clean fragments	Aligned fragments	Align rate(%)	Fragments used	Clonetype.no	With stop codons	Out of frame	filtered.Clonetype.no
Cr016	16490287	12168483	73.79	9626153	13887	1098	3889	6340
Cr022	11109877	8515755	76.65	7823569	12117	811	2350	7379
Cr027	13535161	9269946	68.49	7921330	18352	1287	4193	11034
Cr032	10842557	6674513	61.56	6096663	12641	850	2375	7401
Cr033	13641317	7213471	52.88	6467143	32837	1806	6244	12107
Cr035	13995343	8863002	63.33	7984542	20250	1189	5178	11735
Cr036	16765535	9830033	58.63	8667832	14125	1016	4026	7132
Cr037	10655302	8641373	81.1	7876865	47501	3587	15522	27548
Cr050	15011747	8964035	59.71	7926542	23454	1797	6937	13144
Cr051	11764847	9474222	80.53	8238597	35422	2117	12825	18736
Cr052	17291241	13405311	77.53	11697947	29177	1646	10971	14505
Cr054	11482221	10556015	91.93	9521978	34046	2066	12077	17512
Cr055	11035927	10041504	90.99	9013058	33729	2199	11167	18809
Cr056	10579159	9635121	91.08	8704301	29168	2697	12345	13965
Cr057	14079293	11430431	81.19	9742222	36877	3106	15660	16888
Cr058	7502456	6212382	82.8	5342956	17685	1205	4108	10211
Cr059	7176944	6711105	93.51	6167250	29462	1595	5140	20866
Cr060	21476743	17000766	79.16	14897204	40479	3359	15327	19780
Cr061	19830797	15364176	77.48	13464914	30823	2241	11648	14649
Cr062	15358747	11132074	72.48	9956743	19452	1193	5200	11254
Cr063	17422712	15352414	88.12	13987109	24146	1484	7712	13922
Cr064	20090389	15266485	75.99	13432293	23231	1736	7284	13528
Cr065	12313410	10718779	87.05	9547905	13024	802	2945	8442
Cr066	7938452	3868468	48.73	3420743	10480	668	2156	7039
Cr067	24545470	12658279	51.57	10965338	19816	1294	4450	12704
Cr068	5586379	2688102	48.12	2256784	14923	760	2508	10857
Cr072	15451814	6210624	40.19	5148144	14031	861	2675	9915
Cr073	14462899	12441806	86.03	11168982	25520	1462	4985	17815
Cr074	6494237	2772354	42.69	2407745	11934	723	2346	8379
Cr075	8916617	6949224	77.94	6219991	19168	1151	4104	12277
Cr076	10467375	8188439	78.23	7122816	17118	1143	4888	10064
Cr077	26822978	18742988	69.88	15393009	15434	1233	4913	7527
Cr078	10801590	9061614	83.89	7938315	9138	650	3064	4895
Cr079	11321253	9189260	81.17	7761567	8482	509	3099	3959
Cr080	13169660	9249949	70.24	7759348	15303	806	4970	8535
Cr082	19458972	13408478	68.91	11027073	16022	1307	4831	9008
Cr085	11974948	9044974	75.53	7694151	8938	627	2387	5118
Cr086	8035099	6487804	80.74	5658774	12098	853	3630	7122
Cr087	17152858	12779040	74.5	10982607	9393	885	2541	5074
Cr088	19351085	13938057	72.03	12620164	16822	1231	5546	8431
Cr089	15267650	13117465	85.92	12096088	16632	1666	5479	8764
Cr090	15607353	13741686	88.05	12748583	55663	3613	18565	32492
Cr091	10458979	8786143	84.01	7668727	7140	525	1710	4019
Cr093	13148488	12527396	95.28	11633120	28798	2219	10436	15163
Cr094	15867825	14699548	92.64	13530094	26172	1614	5608	11351
Cr095	21191846	16674818	78.69	15232243	16758	1467	5758	8436
Cr096	12944507	11603359	89.64	10580998	13191	687	3353	7925
Cr097	19573080	17929108	91.6	16093980	20726	1643	7497	10803
Cr099	13239223	11939346	90.18	10537724	11918	964	3408	6557
Gr005	15018048	11916480	79.35	38165	7257	381	1324	5639
Gr011	14316738	12280693	85.78	11055835	24623	1708	6468	12779
Gr012	9311877	8924910	95.84	7986859	23404	1532	7159	13963
Gr013	14815410	13133909	88.65	11808022	18047	1053	5049	9908
Gr015	12774120	11696512	91.56	10535664	23430	1712	6815	13016
Gr016	11756869	7504907	63.83	6757889	20703	1324	5783	11673
Gr019	10308637	8407630	81.56	7551239	28772	1904	8170	17003
Gr021	17168537	12953563	75.45	11639588	21900	1635	7918	11226
Gr023	13322074	10286314	77.21	9026659	12045	754	4642	4854
Gr024	9588846	7093423	73.98	6440294	29802	1920	9314	16850
Gr025	9096028	5738043	63.08	5143646	19823	1225	4622	11143
Gr030	10077661	7319047	72.63	6622055	16863	978	4793	9660
Gr031	11991211	7874629	65.67	6914891	13175	832	4180	6757
Gr034	11540174	8700702	75.39	7884741	24795	1337	6199	14463
Gr035	11167641	8475653	75.89	7633023	19817	1432	5900	11270
Gr037	7805698	5103878	65.39	4522797	15205	1071	4338	8765
Gr038	10159707	7161594	70.49	6228214	21742	1315	6664	12663
Gr040	10340362	8792858	85.03	7963698	26887	1727	7076	14309
Gr041	6462418	5126944	79.33	4634246	20506	1155	5401	11973
Gr042	10285702	8411959	81.78	7490050	13333	903	3524	6879
Gr043	13987419	10951710	78.3	9821953	23694	1516	6527	13830
Gr044	16010464	14736986	92.05	13420776	29123	1586	7926	11486
Gr046	24373540	23166675	95.05	21265915	43439	3044	20133	16744
Gr048	19638175	17763665	90.45	16379533	32480	2473	11872	13564
Gr052	27227245	24823885	91.17	22800942	30996	1343	9939	8827
Gr053	24894012	23251533	93.4	21103666	74590	4187	22964	22021
Gr054	22121117	20934379	94.64	18392482	51279	2683	16041	23452
Gr055	19331574	19241221	99.53	17960410	36418	1718	6345	11527
Gr058	18002848	17418044	96.75	16250628	59778	4552	24312	29005
Gr061	22614002	21968358	97.14	20403140	77010	5598	31616	35074
Gr063	16576971	14035226	84.67	12416004	16717	886	4868	5510
Gr064	21762557	20322328	93.38	18793424	68677	4447	24227	27441
Gr065	27033344	24240739	89.67	22434301	55664	3056	17779	23227
Gr066	17897058	16024150	89.54	14877085	51893	2982	17353	22661
Gr067	15412473	12230976	79.36	11132575	29529	1795	10620	11272
Gr069	19250607	18507155	96.14	17373606	39217	3203	10964	15043
Gr070	17052566	15410876	90.37	13657688	18295	795	3996	8176
Gr074	13977206	12937728	92.56	12184727	38798	2032	9017	22139
Gr075	13790603	13506484	97.94	12688121	50676	3681	16353	23357
Gr076	16295215	15771791	96.79	14741842	38550	1791	8036	17232
Gr078	11093633	10232486	92.24	9404929	35729	1838	9737	17849
Gr079	15923725	14405598	90.47	13242370	33197	1711	10839	16329
Gr080	10499288	9201474	87.64	8245270	17329	947	4035	7634
Gr081	37495840	34765810	92.72	31804850	48112	2545	15022	19158
Gr082	24919180	23596039	94.69	21744131	49725	2284	18088	20258
Gr083	14720517	12620918	85.74	11139672	8153	393	2583	4095
Gr084	20317032	18375145	90.44	16725381	16618	847	4472	7681
Gr086	21767811	20058981	92.15	18311860	20361	1621	7651	9462
Gr087	9146940	7892441	86.29	7203852	9693	484	2673	5461
Gr088	19734350	17352702	87.93	15912297	19795	1008	6196	10248
Gr089	15218780	11699027	76.87	10161109	14312	815	4694	7088
Gr090	15876135	12669167	79.8	11378220	20272	1081	4521	12453
Gr092	18550998	16413838	88.48	14952106	14358	667	4693	7151
Gr094	19512644	17114196	87.71	15425439	9289	491	2908	4543
Gr095	25726537	22843088	88.79	20786987	22647	1330	6621	11203
Gr100	6007850	4544395	75.64	3928569	7588	392	1751	4272
Gr102	28950128	25567981	88.32	23229545	26647	1500	8609	11645
Gr103	11038239	9607795	87.04	8636085	15250	805	3819	9122
Gr104	17227370	13506654	78.4	11682898	13797	828	4790	6126
Gr105	19075718	16090927	84.35	14291910	24074	1729	8076	11828
Gr106	8087956	6505538	80.43	5939956	14746	652	2720	10248
Gr107	7766033	6377041	82.11	5707864	11694	692	3050	7018
Gr108	16062462	13659783	85.04	12396653	27641	1236	8663	15329
Gr109	18537776	15487051	83.54	14070352	25942	1639	6141	16077
Gr110	11959696	9967205	83.34	8862094	18968	1035	5781	10405
Gr111	22769871	20149586	88.49	18647180	22367	1094	6732	10593
Gr112	20448814	18718500	91.54	17403641	21226	1368	5823	10973
Gr113	9436836	7567206	80.19	6665632	9126	777	2994	4924

## Sheet: table4
Table4. The clonotype percentage of different groups in all samples
Sample	Sex	Age	Stage	Group	Sum	Small.T&C.cdr	Small.TorC.cdr	Small.Individual.cdr	Medium.T&C.cdr	Medium.TorC.cdr	Medium.Individual.cdr	Large.T&C.cdr	Large.TorC.cdr	Large.Individual.cdr	Hyper.T&C.cdr	Hyper.TorC.cdr	Hyper.Individual.cdr
Cr016	Male	46	Normal	Control	7974270	0.0381329	0.0241478	0.0109496	0.092685	0.215229	0.177971	0.054058	0.135421	0.192891	0.00780172	0.00910027	0.0416137
Cr022	Male	35	Normal	Control	6573459	0.0560162	0.086843	0.200737	0.0238438	0.0325399	0.115655	0.0444414	0.0472652	0.28685	0.0140381	0.0056039	0.086167
Cr027	Male	47	Normal	Control	6340303	0	0.082849	0.0509384	0.0452027	0.0763005	0.109287	0.0781947	0.0685494	0.350338	0.0201829	0.00935634	0.108801
Cr032	Male	35	Normal	Control	4884537	0.0299922	0.141257	0.0208894	0.0386722	0.0362401	0.228609	0.0556405	0.0315446	0.31525	0.0143942	0.00621144	0.0812986
Cr033	Female	36	Normal	Control	5372449	0	0.344577	0.10967	0.00901898	0.0081192	0.0506655	0.0471068	0.0149736	0.273742	0.0176702	0.00710905	0.117347
Cr035	Male	38	Normal	Control	6652039	0.0912492	0	0.0853161	0.0255938	0.021559	0.0571563	0.0554284	0.0342295	0.410426	0.0291665	0.0123	0.177575
Cr036	Male	40	Normal	Control	7388513	0.104423	0.0542617	0	0.019995	0.0852311	0.0598826	0.0698643	0.140273	0.37269	0.0121005	0.0120802	0.0691988
Cr037	Male	43	Normal	Control	6349063	0	0.067635	0	0.0130476	0.0615584	0	0.0413382	0.108328	0.249563	0.058729	0.0715851	0.328216
Cr050	Female	35	Normal	Control	6456618	0	0.1679	0.0186613	0.0167151	0.0354196	0.0366184	0.0636228	0.0525893	0.393601	0.0285343	0.0133133	0.173025
Cr051	Female	35	Normal	Control	6893568	0	0	0.010332	0.0201011	0.169383	0.301035	0.031562	0.131238	0.159959	0.0238376	0.0215337	0.131019
Cr052	Female	45	Normal	Control	9993362	0.0141582	0.169337	0	0.0258052	0.158499	0.17113	0.0388014	0.176188	0.0990261	0.0193119	0.0313131	0.09643
Cr054	Female	55	Normal	Control	8291437	0.0109971	0.103192	0.0445808	0.0191903	0.164451	0.058963	0.0456847	0.190842	0.171049	0.0251382	0.0203831	0.145529
Cr055	Female	42	Normal	Control	7777423	0.0558693	0	0.166832	0.0191887	0.0627181	0.139807	0.0392378	0.134144	0.201647	0.0267673	0.0186976	0.135091
Cr056	Female	36	Normal	Control	7179936	0.0127001	0.206224	0.014177	0.0404522	0.169558	0.139493	0.0337814	0.140508	0.117193	0.0175472	0.0198357	0.0885307
Cr057	Female	38	Normal	Control	7964456	0.014238	0.0526685	0	0.0274909	0.407725	0	0.0466235	0.314304	0.00012606	0.0201666	0.114886	0.00177099
Cr058	Male	55	Normal	Control	4309928	0.0133691	0.0685972	0	0.0252786	0.438797	0	0.0377992	0.281394	0.000173553	0.0189191	0.11406	0.00161232
Cr059	Male	63	Normal	Control	4824409	0.170385	0.0234901	0.0130841	0.0566689	0.0617667	0.0359024	0.0538366	0.0810638	0.130749	0.0545165	0.23843	0.0801072
Cr060	Female	58	Normal	Control	11160421	0	0.0720536	0.0593315	0.0180327	0.0957115	0.32861	0.0246966	0.0583094	0.183764	0.021353	0.0110729	0.127065
Cr061	Female	65	Normal	Control	11364683	0	0.104532	0.0301759	0.0290311	0.180361	0.0927598	0.0671877	0.117175	0.240844	0.0216025	0.00879347	0.107537
Cr062	Male	63	Normal	Control	8647919	0.168998	0.0651499	0	0.0214886	0.0909125	0	0.0651915	0.364582	0.0470492	0.0251769	0.0914471	0.060004
Cr063	Female	50	Normal	Control	12014532	0.267898	0.0789946	0	0.0440862	0.0744761	0	0.0451506	0.21086	0.0356605	0.0346737	0.119733	0.0884679
Cr064	Female	55	Normal	Control	11368401	0	0.0399835	0	0.0930289	0.281952	0.157976	0.0436006	0.179987	0.0635879	0.0210255	0.0384927	0.080366
Cr065	Male	66	Normal	Control	8396660	0.0427663	0.0473124	0.195097	0.0196526	0.0300691	0.0992349	0.0632486	0.0411281	0.328497	0.019311	0.00660918	0.107073
Cr066	Male	64	Normal	Control	2641549	0.046492	0.0268403	0.087273	0.0295384	0.0488653	0.271585	0.0499559	0.0312544	0.286389	0.0180008	0.00469308	0.0991127
Cr067	Male	61	Normal	Control	9153137	0	0.0463724	0.0742879	0.031658	0.0617351	0.453622	0.029508	0.0140993	0.157857	0.018976	0.00602624	0.105858
Cr068	Female	59	Normal	Control	1930442	0	0	0.0316311	0.0238401	0.0243053	0.423184	0.0429974	0.0196017	0.278456	0.0193697	0.00609135	0.130523
Cr072	Female	65	Normal	Control	4039812	0	0	0.0681871	0.0277033	0.132741	0.313443	0.0311824	0.0440513	0.238781	0.0180912	0.00702656	0.118793
Cr073	Female	58	Normal	Control	8847909	0	0.0510812	0	0.0124658	0.0822115	0.0140857	0.0586584	0.103764	0.357438	0.0411466	0.0322398	0.246909
Cr074	Female	45	Normal	Control	1839634	0.0222566	0.0657794	0.0498403	0.0194604	0.0834992	0.322876	0.0380097	0.0305017	0.238489	0.0167773	0.0053902	0.107121
Cr075	Female	48	Normal	Control	4931866	0.197314	0	0	0.0679501	0.0174352	0.00548454	0.117655	0.218044	0.121871	0.0421913	0.0800707	0.131984
Cr076	Female	64	Normal	Control	5554382	0	0.0242493	0.0211014	0.0569581	0.147924	0.365092	0.0266445	0.097638	0.129066	0.0164645	0.0161627	0.0986995
Cr077	Male	68	Normal	Control	13126549	0	0.0971325	0.0427095	0.012932	0.232038	0.234114	0.0402206	0.114222	0.144278	0.0112148	0.00605117	0.065087
Cr078	Female	82	Normal	Control	6530271	0.312629	0.207066	0	0.0199897	0.07373	0	0.0450701	0.242483	0.0351266	0.00831037	0.0309718	0.0246226
Cr079	Male	71	Normal	Control	6306169	0.040815	0.0520067	0.0536703	0.0663748	0.0767821	0.247805	0.066532	0.0703418	0.298747	0.00379248	0.00178555	0.0213477
Cr080	Female	72	Normal	Control	6266715	0.122252	0.0288342	0.0109737	0.0329074	0.0905436	0.321236	0.0330096	0.0363071	0.19998	0.0159993	0.0067008	0.101258
Cr082	Female	69	Normal	Control	9246068	0.0916456	0.0209034	0.0895604	0.0263769	0.131774	0.26351	0.0313529	0.041633	0.179127	0.0175171	0.00532551	0.101274
Cr085	Female	80	Normal	Control	6715242	0	0.406048	0.0203841	0.0333876	0.0971398	0.157178	0.0275895	0.0648525	0.118797	0.00990612	0.00484033	0.0598778
Cr086	Female	68	Normal	Control	4882945	0.291347	0.0194989	0	0.0562601	0.132508	0.113931	0.0591149	0.114103	0.108004	0.0166459	0.0119031	0.0766841
Cr087	Female	75	Normal	Control	9366634	0.116548	0.233363	0.090257	0.0315864	0.109381	0.188861	0.0182947	0.0354209	0.118981	0.00769262	0.00314094	0.0464728
Cr088	Male	61	Normal	Control	10065799	0.0174243	0.0182817	0.0405063	0.0387276	0.0335767	0.135149	0.0766329	0.0496962	0.49097	0.0153613	0.00534374	0.0783302
Cr089	Male	86	Normal	Control	7265127	0.27003	0.0744897	0.0249934	0.0107106	0.0501924	0.100831	0.0402969	0.0404337	0.243859	0.020074	0.00758129	0.116508
Cr090	Male	61	Normal	Control	10797754	0.0106878	0	0.0338895	0.0134427	0.0576656	0.0306963	0.0420532	0.0230547	0.25741	0.0796364	0.0242185	0.427245
Cr091	Male	79	Normal	Control	5302508	0.0162099	0.0537283	0.270212	0.0325459	0.0817038	0.0916238	0.0660572	0.0889123	0.231766	0.00985383	0.00964336	0.047744
Cr093	Female	63	Normal	Control	9814186	0.0482755	0.0131164	0.0217815	0.00991279	0.0457668	0.0521367	0.0729483	0.0539924	0.456679	0.031972	0.0117374	0.181681
Cr094	Male	68	Normal	Control	11019926	0.287385	0.153412	0.0263805	0.00524768	0.0387325	0.0604107	0.0313748	0.0224015	0.193934	0.0268217	0.00844516	0.145455
Cr095	Male	67	Normal	Control	12059284	0	0.0210513	0.0486715	0.0195575	0.0416044	0.11829	0.0905235	0.0716574	0.48772	0.0159074	0.00656366	0.0784528
Cr096	Male	62	Normal	Control	8944332	0.0166189	0.0809896	0.260588	0.0189329	0.0543688	0.0555527	0.0527219	0.0575355	0.248948	0.0196803	0.0116028	0.122461
Cr097	Female	66	Normal	Control	13530440	0.042146	0.09749	0.0602184	0.0503403	0.120771	0.200061	0.0345216	0.14064	0.146298	0.0150453	0.0194151	0.0730539
Cr099	Male	63	Normal	Control	9402767	0.413187	0.0778343	0	0.0392355	0.0814244	0.0947685	0.0293916	0.081811	0.107715	0.00945934	0.0082749	0.0568988
Gr005	Male	38	I	Tumor	30714	0.040112	0.103438	0	0.0218142	0.133685	0.010028	0.0574331	0.27017	0.167155	0.0194374	0.0711402	0.105587
Gr011	Male	50	IV	Tumor	8704221	0	0.0842538	0.0150213	0.0231968	0.0858778	0.0322462	0.0465023	0.184858	0.283232	0.02696	0.049386	0.168466
Gr012	Male	67	NA	Tumor	6456921	0.0495699	0.112353	0	0.0159742	0.125536	0.00833896	0.0490525	0.313085	0.0706557	0.0276443	0.107898	0.119893
Gr013	Male	69	III	Tumor	9587013	0.0227731	0.0442563	0.0141992	0.00368551	0.14649	0.0497093	0.0526777	0.251827	0.239042	0.0211301	0.041436	0.112774
Gr015	Male	68	IV	Tumor	8167956	0.0510703	0.0806784	0	0.0255349	0.15397	0.0162731	0.0498644	0.252669	0.15013	0.0245573	0.0606723	0.13458
Gr016	Male	73	IV	Tumor	5680983	0.0644499	0.140748	0.0746251	0.0202192	0.0620123	0.0597946	0.0380408	0.0677964	0.298496	0.0204894	0.0203789	0.13295
Gr019	Female	71	III	Tumor	5571906	0.0302629	0.068737	0.0434368	0.0114648	0.0266462	0.0344634	0.0488671	0.0817478	0.347326	0.0321414	0.033011	0.241895
Gr021	Male	48	IV	Tumor	8629665	0.0107998	0.0942342	0.060824	0.0170132	0.0516589	0.0588068	0.0556039	0.0918842	0.399871	0.0158218	0.0165885	0.126893
Gr023	Male	75	IV	Tumor	7035569	0.0176333	0.0498314	0	0.0504953	0.271178	0.150613	0.047875	0.152777	0.231898	0.0029105	0.00624185	0.0185463
Gr024	Male	71	IV	Tumor	4915546	0	0.0395451	0.041286	0.00401237	0.0434051	0.0353247	0.0616456	0.0757891	0.413852	0.0299088	0.027485	0.227746
Gr025	Male	57	IV	Tumor	4075298	0.0221341	0.0326555	0.191603	0.00680245	0.0399887	0.0489397	0.043722	0.101409	0.316243	0.0211668	0.0299006	0.145435
Gr030	Male	77	II	Tumor	5360147	0.0149882	0.100698	0.0290626	0.0154164	0.0407069	0.0412207	0.0567337	0.15496	0.374144	0.0195929	0.0296516	0.122824
Gr031	Female	61	I	Tumor	5266003	0.0433931	0.215554	0.0140416	0.0224124	0.105049	0.0592937	0.045499	0.160337	0.236811	0.0110877	0.019737	0.0667858
Gr034	Male	47	I	Tumor	6494695	0.0124603	0.0445088	0.100198	0.013801	0.0242415	0.015693	0.049738	0.0960753	0.345772	0.0305609	0.0377094	0.229242
Gr035	Male	52	III	Tumor	6158640	0	0.0193665	0	0.00793032	0.0510127	0.0426154	0.0709088	0.145264	0.459145	0.0209965	0.0313244	0.151436
Gr037	Male	66	IV	Tumor	3533698	0	0.0752062	0	0.0240586	0.0777316	0.0657541	0.0733003	0.16107	0.38474	0.0163025	0.0251699	0.0966662
Gr038	Female	77	III	Tumor	4991340	0	0	0	0.0403178	0.126761	0.0846105	0.0762601	0.156627	0.300119	0.0273019	0.0405915	0.147411
Gr040	Male	52	III	Tumor	6465180	0	0.156133	0.019842	0.0226119	0.0378174	0.0334487	0.0512513	0.115083	0.29109	0.0302692	0.0373151	0.205139
Gr041	Male	39	IV	Tumor	3325317	0	0.0776494	0.010645	0.0241318	0.060778	0.0509494	0.0672928	0.183516	0.303457	0.0272221	0.0436142	0.150744
Gr042	Male	68	II	Tumor	5983698	0	0.330545	0.016318	0.0207231	0.0868603	0.0636167	0.0390035	0.174654	0.146932	0.015077	0.038997	0.0672739
Gr043	Male	59	I	Tumor	7866212	0	0.0882408	0.0195021	0.0207584	0.0608753	0.054017	0.0585049	0.19665	0.246521	0.0299275	0.0582817	0.166722
Gr044	Male	62	III	Tumor	12009527	0.0530228	0.546003	0	0.00169599	0.0684892	0	0.0213895	0.0693158	0.0885564	0.0157088	0.0221435	0.113675
Gr046	Female	64	NA	Tumor	17239204	0	0.0968435	0	0.017988	0.184457	0.0180043	0.0690946	0.415574	0.152456	0.00444406	0.0125582	0.02858
Gr048	Male	60	III	Tumor	13347842	0.0423956	0.098869	0	0.0241499	0.0759494	0.0437802	0.053547	0.132888	0.379787	0.0172115	0.0177826	0.11364
Gr052	Male	67	III	Tumor	17469509	0.101805	0.18695	0	0.0447164	0.298761	0.0962565	0.0370963	0.10968	0.114449	0.00134646	0.00155414	0.00738538
Gr053	Male	52	NA	Tumor	16596572	0.0129657	0.048157	0	0.0169458	0.176321	0.0288887	0.0595016	0.287159	0.266416	0.0121103	0.023192	0.0683432
Gr054	Male	63	II	Tumor	15911560	0.0267785	0.379897	0	0.0205796	0.18322	0.0154537	0.0205905	0.127087	0.025459	0.0218535	0.033816	0.145265
Gr055	Male	68	III	Tumor	17393583	0	0.855949	0	0	0.016833	0	0.00826374	0.0453328	0.0173309	0.006606	0.0161672	0.0335171
Gr058	Female	60	III	Tumor	13030456	0.0733235	0.0466056	0.0734733	0.0219526	0.0401446	0.0046082	0.0345064	0.155732	0.176684	0.0379041	0.0900082	0.245058
Gr061	Male	65	I	Tumor	16845999	0.0190794	0.146974	0	0.00840425	0.0803705	0.00949893	0.0290841	0.165794	0.12323	0.0437062	0.122102	0.251756
Gr063	Male	73	IV	Tumor	10425862	0.0253058	0.450003	0.0386267	0.0341381	0.190118	0.00962184	0.0266994	0.165184	0.0283184	0.00356652	0.012702	0.0157167
Gr064	Female	46	II	Tumor	15615372	0.0651934	0.0644916	0	0.00814627	0.0875238	0.0241249	0.0500975	0.236072	0.152931	0.0361319	0.105041	0.170247
Gr065	Male	50	III	Tumor	18751929	0	0.0900231	0	0.0134571	0.100373	0.00283688	0.0576631	0.293008	0.165282	0.029265	0.0900464	0.158046
Gr066	Male	48	III	Tumor	12127610	0	0.0716863	0.0454738	0.00527614	0.0632149	0.00806589	0.0573086	0.219382	0.25737	0.0279216	0.0529141	0.191386
Gr067	Male	61	NA	Tumor	8938894	0	0	0.0475592	0.0215502	0.159819	0.0928439	0.0682985	0.280229	0.262415	0.00764278	0.0163181	0.043324
Gr069	Male	63	III	Tumor	13109662	0.0100774	0.0919809	0.147888	0.00699904	0.0913091	0.00266719	0.0525063	0.158625	0.238068	0.0197636	0.0281482	0.151968
Gr070	Male	67	NA	Tumor	11567432	0.0406097	0.160467	0.0127284	0.0544856	0.330088	0.0509393	0.0237002	0.126618	0.128682	0.00819482	0.00760402	0.0558834
Gr074	Male	56	NA	Tumor	10452365	0.0619788	0.219119	0.0202565	0.0289944	0.107226	0.0152511	0.0232573	0.0797115	0.0859286	0.0405604	0.0620877	0.255629
Gr075	Male	64	III	Tumor	10140137	0.0402063	0.0619813	0	0.0126425	0.0870539	0.0230075	0.0625121	0.181559	0.248025	0.0339017	0.0424029	0.206708
Gr076	Male	22	NA	Tumor	11956548	0.0373535	0.390203	0.0571047	0.0304833	0.150701	0.0388227	0.0167944	0.0468303	0.0439599	0.0195178	0.0303609	0.137868
Gr078	Male	47	II	Tumor	7974903	0	0.0216421	0.0558394	0.00843421	0.11304	0.120881	0.042152	0.21982	0.25196	0.0188124	0.0213068	0.126111
Gr079	Male	60	II	Tumor	11293528	0	0.0736193	0	0.0205899	0.135645	0.124661	0.0472755	0.194159	0.244081	0.0177172	0.0172305	0.125022
Gr080	Male	64	II	Tumor	6699018	0	0.0596622	0.0210779	0.056273	0.307025	0.102204	0.0418436	0.17897	0.138862	0.0127517	0.0112684	0.0700613
Gr081	Male	51	NA	Tumor	26618345	0.0635766	0	0.0133879	0.023839	0.198661	0.0583046	0.0510046	0.327535	0.111794	0.0164319	0.0327414	0.102725
Gr082	Male	75	III	Tumor	18089067	0	0.0476848	0	0.00855296	0.207427	0.0963489	0.0488408	0.272645	0.173081	0.0162344	0.0219454	0.10724
Gr083	Male	63	III	Tumor	9626475	0.160744	0.129335	0.0269112	0.0412755	0.259865	0.115456	0.027771	0.0766288	0.11531	0.00449136	0.00370935	0.0385028
Gr084	Female	65	NA	Tumor	14763266	0.148652	0.0101215	0.331566	0.0181458	0.113768	0.0662361	0.0200733	0.129389	0.0978617	0.00760137	0.0098317	0.0467539
Gr086	Male	61	IV	Tumor	14894748	0	0.0181103	0	0.0495177	0.354098	0.105675	0.0385091	0.238241	0.104947	0.00985864	0.0190024	0.0620404
Gr087	Male	58	III	Tumor	6010074	0.121252	0.0859094	0	0.0665647	0.291752	0.0532701	0.0364819	0.165058	0.109376	0.00791904	0.00851104	0.0539068
Gr088	Male	60	NA	Tumor	13731080	0.0880175	0.199304	0.0172344	0.0218416	0.148172	0.0914641	0.0265059	0.163089	0.148238	0.0107616	0.0145481	0.0708243
Gr089	Female	40	IV	Tumor	8539493	0.0743309	0.0441002	0	0.0346981	0.233086	0.182944	0.0357351	0.130028	0.182803	0.00990878	0.00989122	0.0624748
Gr090	Male	68	NA	Tumor	9531290	0	0.146048	0	0.0256168	0.120746	0.194589	0.0274283	0.130243	0.200286	0.0145728	0.0166776	0.123793
Gr092	Male	65	III	Tumor	12706148	0	0.19677	0	0.0402592	0.254672	0.0843151	0.0418924	0.132756	0.16622	0.00928291	0.00944889	0.0643841
Gr094	Male	81	IV	Tumor	13434582	0.0196709	0.369954	0.185796	0.0469229	0.108262	0.0500603	0.0217	0.0816374	0.071865	0.00479278	0.00363465	0.0357039
Gr095	Male	67	III	Tumor	17221011	0.0465995	0.320929	0.0254786	0.0238286	0.0741113	0.0753829	0.0320434	0.122261	0.164677	0.0122882	0.0112368	0.0911645
Gr100	Male	67	IV	Tumor	3281343	0	0.127734	0.0749047	0.024642	0.227524	0.241068	0.0274942	0.0399038	0.177277	0.0065973	0.00465297	0.0482019
Gr102	Male	63	III	Tumor	19100992	0.0355512	0.0994631	0.0100248	0.0243554	0.232808	0.140587	0.0299592	0.184769	0.147028	0.00960809	0.0145206	0.0713248
Gr103	Female	70	III	Tumor	6147250	0	0.134004	0	0.0261779	0.145197	0.127498	0.0361557	0.222067	0.179505	0.0139279	0.0158165	0.0996516
Gr104	Male	86	NA	Tumor	9625489	0.0801586	0.347181	0.0639494	0.0211055	0.122334	0.116324	0.0153225	0.0659388	0.110801	0.0056634	0.00815938	0.0430631
Gr105	Female	38	III	Tumor	12135239	0	0.0375319	0.0239337	0.0259606	0.250796	0.188152	0.0406502	0.134477	0.190863	0.0128178	0.0101822	0.0846345
Gr106	Male	55	II	Tumor	5477827	0	0.505811	0	0.0153214	0.0408983	0.107629	0.0134208	0.035603	0.177253	0.0107015	0.00893037	0.0844307
Gr107	Female	70	II	Tumor	4887147	0.0321517	0.150503	0.0747919	0.0294853	0.125964	0.183732	0.0229735	0.0742977	0.210745	0.00890847	0.00829502	0.0781519
Gr108	Male	75	II	Tumor	11072304	0	0.117896	0.080708	0.0353054	0.102001	0.127004	0.0304132	0.120303	0.226645	0.0174691	0.0140542	0.128202
Gr109	Male	51	NA	Tumor	12175253	0.0336837	0.22651	0.0499793	0.0209433	0.038719	0.106145	0.0248534	0.101415	0.21972	0.0179511	0.0179857	0.142095
Gr110	Male	70	III	Tumor	7709761	0.0335751	0.15972	0.0381402	0.0116886	0.137767	0.205561	0.0322524	0.0788469	0.188154	0.0126075	0.0102059	0.0914808
Gr111	Male	67	III	Tumor	16028171	0.0940015	0.0391027	0	0.0511517	0.183386	0.181385	0.0278228	0.140461	0.179087	0.0121646	0.0114938	0.0799445
Gr112	Male	62	III	Tumor	15065461	0.139192	0.164641	0.113451	0.00630674	0.0823916	0.0875516	0.024436	0.0994159	0.166449	0.01291	0.0110871	0.0921677
Gr113	Male	67	III	Tumor	5384904	0	0.0476361	0.0540452	0.0523816	0.185504	0.285882	0.030743	0.0718436	0.210119	0.00570632	0.00514772	0.0509922

## Sheet: table5
Table5. HLA comparasion in Control and Tumor group
HLA	With-Tumor-Samples	Without-Tumor-Samples	With-Control-Samples	Without-Control-Samples	pval (Fisher test)
A*02:01	31	29	13	34	0.0172876
C*08:03	0	60	3	44	0.0816938
C*15:02	1	59	5	42	0.0845695
B*40:01	5	55	10	37	0.0901458
B*38:02	4	56	0	47	0.129055
B*39:01	4	56	0	47	0.129055
C*07:02	15	45	6	41	0.143948
A*23:01	1	59	4	43	0.166472
B*15:02	1	59	4	43	0.166472
A*01:01	3	57	6	41	0.176833
B*55:02	0	60	2	45	0.190619
A*33:03	2	58	5	42	0.236287
B*40:02	2	58	5	42	0.236287
A*32:01	3	57	0	47	0.2541
B*15:18	3	57	0	47	0.2541
A*02:06	6	54	9	38	0.261676
B*44:03	3	57	5	42	0.29543
A*11:01	18	42	19	28	0.308227
C*06:02	13	47	6	41	0.310047
B*44:02	4	56	6	41	0.329215
B*13:02	8	52	3	44	0.340566
B*07:02	4	56	1	46	0.382059
A*01:03	0	60	1	46	0.439252
A*02:10	0	60	1	46	0.439252
A*11:02	0	60	1	46	0.439252
B*08:01	0	60	1	46	0.439252
B*15:27	0	60	1	46	0.439252
B*27:04	0	60	1	46	0.439252
B*35:02	0	60	1	46	0.439252
B*35:05	0	60	1	46	0.439252
B*41:01	0	60	1	46	0.439252
B*73:01	0	60	1	46	0.439252
C*01:03	0	60	1	46	0.439252
C*14:03	0	60	1	46	0.439252
C*17:01	0	60	1	46	0.439252
A*31:01	6	54	2	45	0.461465
A*30:01	5	55	2	45	0.462699
B*15:11	5	55	2	45	0.462699
B*14:02	2	58	0	47	0.502733
B*18:01	2	58	0	47	0.502733
B*52:01	2	58	0	47	0.502733
B*57:01	2	58	0	47	0.502733
B*81:01	2	58	0	47	0.502733
C*08:02	2	58	0	47	0.502733
B*35:03	1	59	2	45	0.580875
B*51:02	1	59	2	45	0.580875
B*58:01	1	59	2	45	0.580875
C*03:02	1	59	2	45	0.580875
C*07:06	1	59	2	45	0.580875
C*15:05	1	59	2	45	0.580875
B*46:01	9	51	9	38	0.609982
B*37:01	3	57	1	46	0.629236
C*03:04	13	47	12	35	0.652789
A*24:02	18	42	16	31	0.680536
A*26:01	5	55	5	42	0.745865
C*05:01	5	55	5	42	0.745865
A*02:07	7	53	4	43	0.752153
B*35:01	7	53	4	43	0.752153
C*14:02	7	53	4	43	0.752153
B*51:01	8	52	5	42	0.771067
C*04:01	7	53	7	40	0.774112
C*03:03	15	45	10	37	0.818377
C*08:01	15	45	10	37	0.818377
A*02:03	1	59	0	47	1
A*03:01	6	54	4	43	1
A*03:02	1	59	0	47	1
A*24:08	1	59	0	47	1
A*24:20	1	59	1	46	1
A*24:93	1	59	0	47	1
A*29:01	1	59	0	47	1
A*29:02	1	59	0	47	1
A*33:01	1	59	0	47	1
A*68:01	1	59	1	46	1
B*07:05	1	59	1	46	1
B*13:01	8	52	6	41	1
B*15:01	6	54	4	43	1
B*15:05	1	59	0	47	1
B*15:07	1	59	1	46	1
B*15:46	1	59	0	47	1
B*27:05	1	59	1	46	1
B*38:01	2	58	1	46	1
B*40:06	5	55	4	43	1
B*45:01	1	59	1	46	1
B*48:01	5	55	3	44	1
B*49:01	1	59	0	47	1
B*54:01	3	57	2	45	1
B*67:01	1	59	0	47	1
C*01:02	15	45	11	36	1
C*02:02	1	59	1	46	1
C*03:32	1	59	0	47	1
C*07:01	1	59	0	47	1
C*07:04	1	59	1	46	1
C*12:02	1	59	1	46	1
C*12:03	4	56	3	44	1

## Sheet: table6
Table6. the version and parameter of used softwares
Software	version	parameter
SOAPnuke	v1.5.3	SOAPnuke filter -f $adapter1 -r $adapter2 -1 $fq1 -2 $fq2 -C $sample.r1.fastq -D $sample.r2.fastq -o ./ -l 15 -q 0.5 -n 0.1 -Q 2
MiTCR	v3.0.13	mixcr align -t 8 -f -s hs -r $sample.report --library imgt $fq1 $fq2 $sample.alignments.vdjca
		mixcr assemble -t 8 -f $sample.alignments.vdjca $sample.clones.clns
		mixcr exportClones -f --chains TRB $sample.clones.clns $sample.clones.txt
Optitype	v1.3.1	OptiTypePipeline.py -i $fq1 $fq2 --dna --outdir ./--prefix $sample
iSMART	v3	python iSMARTf3.py -f input.txt ./
